# Supplementary material
Source: PubMed Central journal article supplement (PMC4699868)
Supplement: NIHMS671616-supplement-1.pdf [file NIHMS671616-supplement-1.pdf]

**SLEEP MEDICINE**  
*An International Journal*

**Editor-in-Chief**  
Sudhansu Chokroverty, M.D.  
JFK New Jersey Neuroscience Institute  
65 James Street  
Edison, NJ 08818  
Tel: 732-321-7950  
Fax: 732-321-7336  
or 732-205-1477  
Email: [schok@worldnet.att.net](mailto:schok@worldnet.att.net)

**Publisher**  
Elsevier B.V. Amsterdam

**AUTHOR(S) CONCURRENCE FORM**

The undersigned authors and co-authors have read and they agree with the content of manuscript # SLLEEP-D-14-00524 being considered for publication in *Sleep Medicine*. The authors acknowledge that the material presented in the manuscript has not been previously published, except in abstract form, or is not simultaneously under consideration by any other journal.

Failure to adhere to the above agreement constitutes a fraudulent submission and may cause a published paper to be retracted or the authors to be prohibited from further submission to *Sleep Medicine*.

**Title** Discrimination and sleep: a systematic review  
\_\_\_\_\_  
\_\_\_\_\_  
\_\_\_\_\_  
\_\_\_\_\_  
\_\_\_\_\_  
\_\_\_\_\_

**All Authors must sign**

|              |                        |
|--------------|------------------------|
| Author _____ | Date <u>11/12/2014</u> |
| Author _____ | Date _____             |
